# Supplementary material
Source: PubMed Central journal article supplement (PMC6684874)
Supplement: NIHMS1519323-supplement-1.pdf [file NIHMS1519323-supplement-1.pdf]

Supplemental Table 1 – Functions of the distributions utilized in the probabilistic risk assessment using @Risk software version 7.5.0 (Palisade Corporation, Ithaca, NY)

| Name                                                  | Function                                                                                                                                      | Min         | Mean      | Max      |
|-------------------------------------------------------|-----------------------------------------------------------------------------------------------------------------------------------------------|-------------|-----------|----------|
| Commercial Adult Body Weight Distribution (kg)        | RiskExtvalue(73.348,17.204,RiskTruncate(45,159),RiskName("Commercial Adult Body Weight Distribution"))                                        | 45          | 82.86351  | 159      |
| Recreational Adult Body Weight Distribution (kg)      | RiskLoglogistic(-26.286,107.6,9.629,RiskTruncate(40,155),RiskName("Recreational Adult Body Weight Distribution"))                             | 40          | 83.09947  | 155      |
| Filipino-American Adult Body Weight Distribution (kg) | RiskExtvalue(62.6791,9.5726,RiskTruncate(45,126),RiskName("Filipino-American Adult Body Weight Distribution"))                                | 45          | 68.15746  | 126      |
| Commercial finfish consumption (g/kg-d)               | RiskLognorm(0.69063,0.84115,RiskTruncate(0,8.25),RiskShift(-0.0050137),RiskName("Commercial finfish consumption"),RiskCorrmat(Commercial,1))  | -0.0050137  | 0.6747016 | 8.244987 |
| Commercial shrimp consumption (g/kg-d)                | RiskLoglogistic(-0.0040925,0.26596,1.877,RiskTruncate(0,10.37),RiskName("Commercial shrimp consumption"),RiskCorrmat(Commercial,2))           | 1.73472E-18 | 0.4211565 | 10.37    |
| Commercial oyster consumption (g/kg-d)                | RiskInvgauss(0.28359,0.077571,RiskTruncate(0,5.59),RiskShift(-0.0018339),RiskName("Commercial oyster consumption"),RiskCorrmat(Commercial,3)) | -0.0018339  | 0.2745509 | 5.588166 |
| Commercial crab consumption (g/kg-d)                  | RiskLoglogistic(0.0044641,0.05197,1.4147,RiskTruncate(,6.53),RiskName("Commercial crab consumption"),RiskCorrmat(Commercial,4))               | 0.0044641   | 0.1256812 | 6.53     |

| Name                                          | Function                                                                                                                                       | Min        | Mean      | Max      |
|-----------------------------------------------|------------------------------------------------------------------------------------------------------------------------------------------------|------------|-----------|----------|
| Recreational fish consumption (g/kg-d)        | RiskLognorm(0.45467,0.4493,RiskTruncate(0,4.1),RiskShift(-0.0076128),RiskName("Recreational fish consumption"),RiskCorrmat(Recreational,1))    | -0.0076128 | 0.441991  | 4.092387 |
| Recreational shrimp consumption (g/kg-d)      | RiskLoglogistic(0.010428,0.1795,1.812,RiskTruncate(,8.09),RiskName("Recreational shrimp consumption"),RiskCorrmat(Recreational,2))             | 0.010428   | 0.3079388 | 8.09     |
| Recreational oyster consumption (g/kg-d)      | RiskLoglogistic(0.0053281,0.063046,1.4421,RiskTruncate(,7.55),RiskName("Recreational oyster consumption"),RiskCorrmat(Recreational,3))         | 0.0053281  | 0.1479921 | 7.55     |
| Recreational crab consumption (g/kg-d)        | RiskLoglogistic(0.0058625,0.033866,1.212,RiskTruncate(,9.84),RiskName("Recreational crab consumption"),RiskCorrmat(Recreational,4))            | 0.0058625  | 0.1159103 | 9.84     |
| Filipino-American fish consumption (g/kg-d)   | RiskExpon(0.78334,RiskTruncate(,5.49),RiskShift(0.11368),RiskName("Filipino-American fish consumption"),RiskCorrmat(Filipino,1))               | 0.11368    | 0.8920618 | 5.60368  |
| Filipino-American shrimp consumption (g/kg-d) | RiskExpon(0.46703,RiskTruncate(,3.22),RiskShift(0.0020181),RiskName("Filipino-American shrimp consumption"),RiskCorrmat(Filipino,2))           | 0.0020181  | 0.4657881 | 3.222018 |
| Filipino-American oyster consumption (g/kg-d) | RiskLognorm(0.14949,0.70558,RiskTruncate(,7.43),RiskShift(0.0093166),RiskName("Filipino-American oyster consumption"),RiskCorrmat(Filipino,3)) | 0.0093166  | 0.1448571 | 7.439317 |

| Name                                        | Function                                                                                                                                                            | Min       | Mean       | Max      |
|---------------------------------------------|---------------------------------------------------------------------------------------------------------------------------------------------------------------------|-----------|------------|----------|
| Filipino-American crab consumption (g/kg-d) | RiskLognorm(0.069572,0.16379,RiskTruncate(,1.86),RiskShift(0.0062743),RiskName("Filipino-American crab consumption"),RiskCorrmat(Filipino,4))                       | 0.0062743 | 0.07289762 | 1.866274 |
| Naphthalene in oiled area fish (ng/g)       | RiskLognorm(0.50981,2.037,RiskTruncate(,21.6),RiskShift(0.089548),RiskName("Naphthalene in oiled area fish"),RiskCorrmat(Oiledfish,1))                              | 0.089548  | 0.5575954  | 21.68955 |
| Naphthalene in oiled area shrimp (ng/g)     | RiskCumul(0,1.03,{0,0.1,0.25,0.35,0.92,1.03},{0,0.57,0.93,0.96,0.98,1},RiskCorrmat(Oiledshrimp,1),RiskName("Naphthalene in oiled area shrimp"))                     | 0         | 0.1327     | 1.03     |
| Naphthalene in oiled area oyster (ng/g)     | RiskCumul(0,3.83,{0,0.25,3.83},{0,0.957,1},RiskCorrmat(Oiledoyster,1),RiskName("Naphthalene in oiled area oyster"))                                                 | 0         | 0.207345   | 3.83     |
| Naphthalene in oiled area crab (ng/g)       | RiskCumul(0,14.7,{0,0.1,0.25,0.6,1.7,2.4,9.6,13,14.7},{0,0.47,0.63,0.74,0.79,0.84,0.89,0.95,1},RiskCorrmat(Oiledcrab,1),RiskName("Naphthalene in oiled area crab")) | 0         | 1.92875    | 14.7     |
| Naphthalene in non-oiled area fish (ng/g)   | RiskLoglogistic(0.0092744,0.12443,1.2138,RiskTruncate(,34.4),RiskName("Naphthalene in non-oiled area fish"),RiskCorrmat(Nonoiledfish,1))                            | 0.0092744 | 0.4102802  | 34.4     |
| Naphthalene in non-oiled area shrimp (ng/g) | RiskCumul(0,0.74,{0,0.1,0.25,0.35,0.57,0.74},{0,0.61,0.86,0.92,0.96,1},RiskCorrmat(Nonoiledshrimp,1),RiskName("Naphthalene in non-oiled area shrimp"))              | 0         | 0.13685    | 0.74     |

| Name                                         | Function                                                                                                                                                                               | Min        | Mean      | Max      |
|----------------------------------------------|----------------------------------------------------------------------------------------------------------------------------------------------------------------------------------------|------------|-----------|----------|
| Naphthalene in non-oiled area oyster (ng/g)  | RiskCumul(0,6.4,{0,0.1,0.2,0.25,0.3,0.9,1.6,3.2,4.7,6.4},{0,0.37,0.45,0.89,0.93,0.95,0.96,0.97,0.99,1},RiskCorrmat(Nonoiledoyster,1),RiskName("Naphthalene in non-oiled area oyster")) | 0          | 0.3235    | 6.4      |
| Naphthalene in non-oiled area crab (ng/g)    | RiskCumul(0,6.5,{0,0.1,0.2,0.25,0.5,1,2.7,6.5},{0,0.51,0.7,0.88,0.91,0.95,0.975,1},RiskCorrmat(Nonoiledcrab,1),RiskName("Naphthalene in non-oiled area crab"))                         | 0          | 0.297     | 6.5      |
| Acenaphthylene in oiled area fish (ng/g)     | RiskCumul(0,0.3,{0,0.1,0.2,0.25,0.3},{0,0.31,0.91,0.997,1},RiskCorrmat(Oiledfish,2),RiskName("Acenaphthylene in oiled area fish"))                                                     | 0          | 0.1259    | 0.3      |
| Acenaphthene in oiled area fish (ng/g)       | RiskCumul(0,15.2,{0,0.1,0.2,0.25,3.2,8.7,15.2},{0,0.31,0.9,0.986,0.993,0.996,1},RiskCorrmat(Oiledfish,3),RiskName("Acenaphthene in oiled area fish"))                                  | 0          | 0.201075  | 15.2     |
| Acenaphthene in non-oiled area oyster (ng/g) | RiskCumul(0,2.56,{0,0.1,0.2,0.25,2.56},{0,0.38,0.51,0.99,1},RiskCorrmat(Nonoiledoyster,2),RiskName("Acenaphthene in non-oiled area oyster"))                                           | 0          | 0.16055   | 2.56     |
| Fluorene in oiled area fish (ng/g)           | RiskInvgauss(0.39185,0.28864,RiskTruncate(0,12.49),RiskShift(-0.0084099),RiskName("Fluorene in oiled area fish"),RiskCorrmat(Oiledfish,4))                                             | -0.0084099 | 0.3834466 | 12.48159 |
| Fluorene in oiled area shrimp (ng/g)         | RiskExpon(0.13977,RiskTruncate(,1),RiskShift(0.047504),RiskName("Fluorene in oiled area shrimp"),RiskCorrmat(Oiledshrimp,2))                                                           | 0.047504   | 0.1864939 | 1.047504 |

| Name                                     | Function                                                                                                                                                               | Min       | Mean      | Max      |
|------------------------------------------|------------------------------------------------------------------------------------------------------------------------------------------------------------------------|-----------|-----------|----------|
| Fluorene in oiled area crab (ng/g)       | RiskCumul(0,3.63,{0,0.1,0.2,0.5,2.65,3.63},{0,0.68,0.79,0.9,0.95,1},RiskCorrmat(Oiledcrab,2),RiskName("Fluorene in oiled area crab"))                                  | 0         | 0.32475   | 3.63     |
| Fluorene in non-oiled area fish (ng/g)   | RiskCumul(0,3,{0,0.1,0.2,0.25,0.5,1,1.5,2,2.5,3},{0,0.34,0.58,0.8,0.87,0.87,0.9,0.96,0.98,1},RiskCorrmat(Nonoiledfish,2),RiskName("Fluorene in non-oiled area fish"))  | 0         | 0.37125   | 3        |
| Fluorene in non-oiled area shrimp (ng/g) | RiskCumul(0,2.72,{0,0.1,0.25,0.5,0.75,0.94,1.12,2.72},{0,0.76,0.86,0.88,0.94,0.96,0.98,1},RiskCorrmat(Nonoiledshrimp,2),RiskName("Fluorene in non-oiled area shrimp")) | 0         | 0.1764    | 2.72     |
| Fluorene in non-oiled area oyster (ng/g) | RiskCumul(0,1.1,{0,0.1,0.2,0.25,0.61,1.1},{0,0.42,0.54,0.97,0.985,1},RiskCorrmat(Nonoiledoyster,3),RiskName("Fluorene in non-oiled area oyster"))                      | 0         | 0.155025  | 1.1      |
| Fluorene in non-oiled area crab (ng/g)   | RiskCumul(0,0.5,{0,0.1,0.2,0.25,0.5},{0,0.56,0.7,0.98,1},RiskCorrmat(Nonoiledcrab,2),RiskName("Fluorene in non-oiled area crab"))                                      | 0         | 0.1195    | 0.5      |
| Phenanthrene in oiled area fish (ng/g)   | RiskPearson5(1.3433,0.38367,RiskTruncate(0,55.5),RiskShift(-0.041723),RiskName("Phenanthrene in oiled area fish"),RiskCorrmat(Oiledfish,5))                            | -0.041723 | 0.8500915 | 55.45828 |
| Phenanthrene in oiled area shrimp (ng/g) | RiskInvgauss(1.247,0.16962,RiskTruncate(0,39.6),RiskShift(-0.02003),RiskName("Phenanthrene in oiled area shrimp"),RiskCorrmat(Oiledshrimp,3))                          | -0.02003  | 1.174517  | 39.57997 |

| Name                                         | Function                                                                                                                                                                                      | Min       | Mean     | Max      |
|----------------------------------------------|-----------------------------------------------------------------------------------------------------------------------------------------------------------------------------------------------|-----------|----------|----------|
| Phenanthrene in oiled area oyster (ng/g)     | RiskInvgauss(1.7981,0.47003,RiskTruncate(0,37),RiskShift(-0.03245),RiskName("Phenanthrene in oiled area oyster"),RiskCorrmat(Oiledoyster,2))                                                  | -0.03245  | 1.720091 | 36.96755 |
| Phenanthrene in oiled area crab (ng/g)       | RiskCumul(0,22.7,{0,0.1,0.2,0.8,12.9,13.9,15,22.7},{0,0.53,0.69,0.8,0.85,0.9,0.95,1},RiskCorrmat(Oiledcrab,3),RiskName("Phenanthrene in oiled area crab"))                                    | 0         | 2.783    | 22.7     |
| Phenanthrene in non-oiled area fish (ng/g)   | RiskInvgauss(1.2525,0.25015,RiskTruncate(0,30.8),RiskShift(-0.020716),RiskName("Phenanthrene in non-oiled area fish"),RiskCorrmat(Nonoiledfish,3))                                            | -0.020716 | 1.192392 | 30.77928 |
| Phenanthrene in non-oiled area shrimp (ng/g) | RiskCumul(0,10.7,{0,0.1,0.25,0.7,1.75,3,4.5,5.2,7,10,10.7},{0,0.69,0.76,0.78,0.82,0.88,0.9,0.94,0.96,0.98,1},RiskCorrmat(Nonoiledshrimp,3),RiskName("Phenanthrene in non-oiled area shrimp")) | 0         | 1.01575  | 10.7     |
| Phenanthrene in non-oiled area oyster (ng/g) | RiskCumul(0,8.4,{0,0.1,0.2,0.25,0.5,1,1.3,4.2,8.4},{0,0.32,0.46,0.87,0.89,0.95,0.97,0.985,1},RiskCorrmat(Nonoiledoyster,4),RiskName("Phenanthrene in non-oiled area oyster"))                 | 0         | 0.3405   | 8.4      |
| Phenanthrene in non-oiled area crab (ng/g)   | RiskCumul(0,1.5,{0,0.1,0.2,0.25,0.65,0.85,1.25,1.5},{0,0.51,0.67,0.88,0.93,0.95,0.98,1},RiskCorrmat(Nonoiledcrab,3),RiskName("Phenanthrene in non-oiled area crab"))                          | 0         | 0.19325  | 1.5      |
| Anthracene in oiled area fish (ng/g)         | RiskCumul(0,4,{0,0.1,0.2,0.25,0.5,1,2,2.4,4},{0,0.29,0.72,0.8,0.86,0.89,0.993,0.997,1},RiskCorrmat(Oiledfish,6),RiskName("Anthracene in oiled area fish"))                                    | 0         | 0.3149   | 4        |

| Name                                         | Function                                                                                                                                                                               | Min       | Mean      | Max      |
|----------------------------------------------|----------------------------------------------------------------------------------------------------------------------------------------------------------------------------------------|-----------|-----------|----------|
| Fluoranthene in oiled area fish (ng/g)       | RiskCumul(0,5.2,{0,0.1,0.2,0.25,0.5,1,2.3,2.5,3.4,5.2},{0,0.27,0.75,0.82,0.93,0.96,0.99,0.993,0.996,1},RiskCorrmat(Oiledfish,7),RiskName("Fluoranthene in oiled area fish"))           | 0         | 0.24775   | 5.2      |
| Fluoranthene in oiled area shrimp (ng/g)     | RiskCumul(0,0.96,{0,0.1,0.25,0.96},{0,0.68,0.98,1},RiskCorrmat(Oiledshrimp,4),RiskName("Fluoranthene in oiled area shrimp"))                                                           | 0         | 0.0986    | 0.96     |
| Fluoranthene in oiled area oysters (ng/g)    | RiskPareto(1.9079,0.2,RiskTruncate(,10.08),RiskName("Fluoranthene in oiled area oysters"),RiskCorrmat(Oiledoyster,3))                                                                  | 0.2       | 0.4085737 | 10.08    |
| Fluoranthene in oiled area crab (ng/g)       | RiskCumul(0,0.8,{0,0.1,0.2,0.8},{0,0.47,0.89,1},RiskCorrmat(Oiledcrab,4),RiskName("Fluoranthene in oiled area crab"))                                                                  | 0         | 0.1415    | 0.8      |
| Fluoranthene in non-oiled area fish (ng/g)   | RiskPearson5(2.0339,0.33559,RiskTruncate(0,6.9),RiskShift(-0.016187),RiskName("Fluoranthene in non-oiled area fish"),RiskCorrmat(Nonoiledfish,4))                                      | -0.016187 | 0.2950051 | 6.883813 |
| Fluoranthene in non-oiled area oyster (ng/g) | RiskCumul(0,11.7,{0,0.1,0.2,0.25,0.5,1,1.3,2.7,3.7,11.7},{0,0.39,0.5,0.88,0.92,0.92,0.95,0.97,0.99,1},RiskCorrmat(Nonoiledoyster,5),RiskName("Fluoranthene in non-oiled area oyster")) | 0         | 0.352     | 11.7     |
| Fluoranthene in non-oiled area crab (ng/g)   | RiskCumul(0,0.25,{0,0.1,0.2,0.25},{0,0.63,0.79,1},RiskCorrmat(Nonoiledcrab,4),RiskName("Fluoranthene in non-oiled area crab"))                                                         | 0         | 0.10275   | 0.25     |

| Name                                     | Function                                                                                                                                              | Min | Mean    | Max  |
|------------------------------------------|-------------------------------------------------------------------------------------------------------------------------------------------------------|-----|---------|------|
| Pyrene in oiled area fish (ng/g)         | RiskCumul(0,1.62,{0,0.1,0.2,0.25,0.5,1,1.62},{0,0.32,0.91,0.983,0.986,0.99,1},RiskCorrmat(Oiledfish,8),RiskName("Pyrene in oiled area fish"))         | 0   | 0.13815 | 1.62 |
| Pyrene in oiled area shrimp (ng/g)       | RiskCumul(0,1.58,{0,0.1,0.25,0.5,1.58},{0,0.64,0.91,0.98,1},RiskCorrmat(Oiledshrimp,5),RiskName("Pyrene in oiled area shrimp"))                       | 0   | 0.1263  | 1.58 |
| Pyrene in oiled area oyster (ng/g)       | RiskUniform(0,0.25,RiskCorrmat(Oiledoyster,4),RiskName("Pyrene in oiled area oyster"))                                                                | 0   | 0.125   | 0.25 |
| Pyrene in non-oiled area fish (ng/g)     | RiskCumul(0,0.73,{0,0.1,0.2,0.25,0.5,0.65,0.73},{0,0.47,0.72,0.96,0.98,0.99,1},RiskCorrmat(Nonoiledfish,5),RiskName("Pyrene in non-oiled area fish")) | 0   | 0.13515 | 0.73 |
| Pyrene in non-oiled area oyster (ng/g)   | RiskCumul(0,0.25,{0,0.1,0.21,0.25},{0,0.41,0.54,1},RiskCorrmat(Nonoiledoyster,6),RiskName("Pyrene in non-oiled area oyster"))                         | 0   | 0.14645 | 0.25 |
| Pyrene in non-oiled area crab (ng/g)     | RiskCumul(0,1.2,{0,0.1,0.2,0.25,1.2},{0,0.58,0.74,0.95,1},RiskCorrmat(Nonoiledcrab,5),RiskName("Pyrene in non-oiled area crab"))                      | 0   | 0.1365  | 1.2  |
| C1 Naphthalene in oiled area fish (ng/g) | RiskCumul(0,1.95,{0,0.1,0.2,0.25,0.5,1.95},{0,0.3,0.91,0.993,0.996,1},RiskCorrmat(Oiledfish,9),RiskName("C1 naphthalenes in oiled area fish"))        | 0   | 0.1312  | 1.95 |



| Name                                         | Function                                                                                                                                           | Min      | Mean     | Max      |
|----------------------------------------------|----------------------------------------------------------------------------------------------------------------------------------------------------|----------|----------|----------|
| C1 Naphthalene in oiled area crab (ng/g)     | RiskCumul(0,1.38,{0,0.1,0.2,0.43,1.18,1.38},{0,0.56,0.83,0.89,0.94,1},RiskCorrmat(Oiledcrab,5),RiskName("C1 naphthalenes in oiled area crab"))     | 0        | 0.20445  | 1.38     |
| C1 Naphthalene in non-oiled area fish (ng/g) | RiskLognorm(0.16796,0.15181,RiskTruncate(,1.4),RiskShift(0.049343),RiskName("C1 Naphthalenes in non-oiled area fish"),RiskCorrmat(Nonoiledfish,6)) | 0.049343 | 0.215904 | 1.449343 |
| C1 Naphthalene in non-oiled area crab (ng/g) | RiskCumul(0,1.1,{0,0.1,0.2,0.25,1.1},{0,0.58,0.77,0.98,1},RiskCorrmat(Nonoiledcrab,6),RiskName("C1 naphthalenes in non-oiled area crab"))          | 0        | 0.11825  | 1.1      |
| C1 Phenanthrene in oiled area fish (ng/g)    | RiskCumul(0,2.92,{0,0.1,0.2,0.25,0.5,2.92},{0,0.22,0.75,0.92,0.997,1},RiskCorrmat(Oiledfish,10),RiskName("C1 Phenanthrenes in oiled area fish"))   | 0        | 0.162755 | 2.92     |
| C1 Phenanthrene in oiled area crab (ng/g)    | RiskCumul(0,9.21,{0,0.1,0.2,0.25,7.24,9.21},{0,0.56,0.67,0.89,0.94,1},RiskCorrmat(Oiledcrab,6),RiskName("Phenanthrenes in oiled area crab"))       | 0        | 0.77475  | 9.21     |
| C1 Pyrene in non-oiled area crab (ng/g)      | RiskCumul(0,0.63,{0,0.1,0.2,0.25,0.63},{0,0.71,0.94,0.98,1},RiskCorrmat(Nonoiledcrab,7),RiskName(" C1 Pyrenes in non-oiled area crab"))            | 0        | 0.0878   | 0.63     |

Supplemental Table 2 – Correlations utilized in the probabilistic assessment using @Risk software version 7.5.0 (Palisade Corporation, Ithaca, NY)

| @RISK Correlations for oiled fish | Naphthalene | Acenaphthylene | Acenaphthene | Fluorene | Phenanthrene | Anthracene | Fluoranthene | Pyrene | C1 Naphthalenes | C1 Phenanthrenes |
|-----------------------------------|-------------|----------------|--------------|----------|--------------|------------|--------------|--------|-----------------|------------------|
| Naphthalene                       | 1           |                |              |          |              |            |              |        |                 |                  |
| Acenaphthylene                    | 0.43        | 1              |              |          |              |            |              |        |                 |                  |
| Acenaphthene                      | 0.21        | 0              | 1            |          |              |            |              |        |                 |                  |
| Fluorene                          | 0.42        | 0              | 0            | 1        |              |            |              |        |                 |                  |
| Phenanthrene                      | 0.44        | 0              | 0            | 0        | 1            |            |              |        |                 |                  |
| Anthracene                        | 0.41        | 0              | 0            | 0        | 0            | 1          |              |        |                 |                  |
| Fluoranthene                      | 0.4         | 0              | 0            | 0        | 0            | 0          | 1            |        |                 |                  |
| Pyrene                            | 0.36        | 0              | 0            | 0        | 0            | 0          | 0            | 1      |                 |                  |
| C1 Naphthalenes                   | 0.29        | 0              | 0            | 0        | 0            | 0          | 0            | 0      | 1               |                  |
| C1 Phenanthrenes                  | 0           | 0              | 0            | 0        | 0            | 0          | 0            | 0      | 0               | 1                |

| @RISK Correlations for oiled shrimp | Naphthalene | Fluorene | Phenanthrene | Fluoranthene | Pyrene |
|-------------------------------------|-------------|----------|--------------|--------------|--------|
| Naphthalene                         | 1           |          |              |              |        |
| Fluorene                            | 0.48        | 1        |              |              |        |
| Phenanthrene                        | 0.36        | 0        | 1            |              |        |
| Fluoranthene                        | 0.51        | 0        | 0            | 1            |        |
| Pyrene                              | 0.33        | 0        | 0            | 0            | 1      |

| @RISK Correlations for oiled oyster | Naphthalene | Phenanthrene | Fluoranthene | Pyrene |
|-------------------------------------|-------------|--------------|--------------|--------|
| Naphthalene                         | 1           |              |              |        |
| Phenanthrene                        | 0.34        | 1            |              |        |
| Fluoranthene                        | 0.55        | 0            | 1            |        |
| Pyrene                              | 0.52        | 0            | 0            | 1      |

| @RISK Correlations for oiled crab | Naphthalene | Fluorene | Phenanthrene | Fluoranthene | C1 Naphthalenes | C1 Phenanthrenes |
|-----------------------------------|-------------|----------|--------------|--------------|-----------------|------------------|
| Naphthalene                       | 1           |          |              |              |                 |                  |
| Fluorene                          | 0.39        | 1        |              |              |                 |                  |
| Phenanthrene                      | 0.44        | 0        | 1            |              |                 |                  |
| Fluoranthene                      | 0.22        | 0        | 0            | 1            |                 |                  |
| C1 Naphthalenes                   | 0.22        | 0        | 0            | 0            | 1               |                  |
| C1 Phenanthrenes                  | 0.3         | 0        | 0            | 0            | 0               | 1                |

| @RISK Correlations for non-oiled fish | Naphthalene | Fluorene | Phenanthrene | Fluoranthene | Pyrene | C1 Naphthalenes |
|---------------------------------------|-------------|----------|--------------|--------------|--------|-----------------|
| Naphthalene                           | 1           |          |              |              |        |                 |
| Fluorene                              | 0.4         | 1        |              |              |        |                 |
| Phenanthrene                          | 0.43        | 0        | 1            |              |        |                 |
| Fluoranthene                          | 0.47        | 0        | 0            | 1            |        |                 |
| Pyrene                                | 0.4         | 0        | 0            | 0            | 1      |                 |
| C1 Naphthalenes                       | 0.2         | 0        | 0            | 0            | 0      | 1               |

| @RISK Correlations for non-oiled shrimp | Naphthalene | Fluorene | Phenanthrene |
|-----------------------------------------|-------------|----------|--------------|
| Naphthalene                             | 1           |          |              |
| Fluorene                                | 0.53        | 1        |              |
| Phenanthrene                            | 0.38        | 0        | 1            |

| @RISK Correlations for non-oiled oyster | Naphthalene | Acenaphthene | Fluorene | Phenanthrene | Fluoranthene | Pyrene |
|-----------------------------------------|-------------|--------------|----------|--------------|--------------|--------|
| Naphthalene                             | 1           |              |          |              |              |        |
| Acenaphthene                            | 0.39        | 1            |          |              |              |        |
| Fluorene                                | 0.39        | 0.39         | 1        |              |              |        |
| Phenanthrene                            | 0.39        | 0.39         | 0.39     | 1            |              |        |
| Fluoranthene                            | 0.39        | 0.39         | 0.39     | 0.39         | 1            |        |
| Pyrene                                  | 0.39        | 0.39         | 0.39     | 0.39         | 0.39         | 1      |

| @RISK Correlations for non-oiled crab | Naphthalene | Fluorene | Phenanthrene | Fluoranthene | Pyrene | C1 Naphthalenes | C1 Pyrenes |
|---------------------------------------|-------------|----------|--------------|--------------|--------|-----------------|------------|
| Naphthalene                           | 1           |          |              |              |        |                 |            |
| Fluorene                              | 0.28        | 1        |              |              |        |                 |            |
| Phenanthrene                          | 0.28        | 0.28     | 1            |              |        |                 |            |
| Fluoranthene                          | 0.28        | 0.28     | 0.28         | 1            |        |                 |            |
| Pyrene                                | 0.28        | 0.28     | 0.28         | 0.28         | 1      |                 |            |
| C1 Naphthalenes                       | 0.28        | 0.28     | 0.28         | 0.28         | 0.28   | 1               |            |
| C1 Pyrenes                            | 0.28        | 0.28     | 0.28         | 0.28         | 0.28   | 0.28            | 1          |

| @RISK Correlations for commercial workers | Finfish | Shrimp | Oyster | Blue crab |
|-------------------------------------------|---------|--------|--------|-----------|
| Finfish (g/kg-d)                          | 1       |        |        |           |
| Shrimp (g/kg-d)                           | 0.43    | 1      |        |           |
| Oyster (g/kg-d)                           | 0.23    | 0.19   | 1      |           |
| Blue crab (g/kg-d)                        | 0.43    | 0.33   | 0.23   | 1         |

| @RISK Correlations for recreational fishers | Finfish | Shrimp | Oyster | Blue crab |
|---------------------------------------------|---------|--------|--------|-----------|
| Finfish (g/kg-d)                            | 1       |        |        |           |
| Shrimp (g/kg-d)                             | 0.42    | 1      |        |           |
| Oyster (g/kg-d)                             | 0.38    | 0.1    | 1      |           |
| Blue crab (g/kg-d)                          | 0.19    | 0.14   | 0.35   | 1         |

| @RISK Correlations for Filipino-Americans | Finfish | Shrimp | Oyster | Blue crab |
|-------------------------------------------|---------|--------|--------|-----------|
| Finfish (g/kg-d)                          | 1       |        |        |           |
| Shrimp (g/kg-d)                           | 0.52    | 1      |        |           |
| Oyster (g/kg-d)                           | 0.17    | 0      | 1      |           |
| Blue crab (g/kg-d)                        | 0.25    | 0.55   | 0.31   | 1         |
